# Supplementary material for: The Structural Basis for mRNA Recognition and Cleavage by the Ribosome-Dependent Endonuclease RelE
Source: PubMed Central journal article supplement (PMC2807027; doi:10.1016/j.cell.2009.11.015), 2009-12-11
Supplement: mmc1.pdf [file mmc1.pdf]

Cell, Volume 139

## **Supplemental Data**

### **The Structural Basis for mRNA**

### **Recognition and Cleavage by the**

### **Ribosome-Dependent Endonuclease RelE**

**Cajetan Neubauer, Yong-Gui Gao, Kasper R. Andersen, Christine M. Dunham, Ann C. Kelley, Jendrik Hentschel, Kenn Gerdes, V. Ramakrishnan, and Ditlev E. Brodersen**

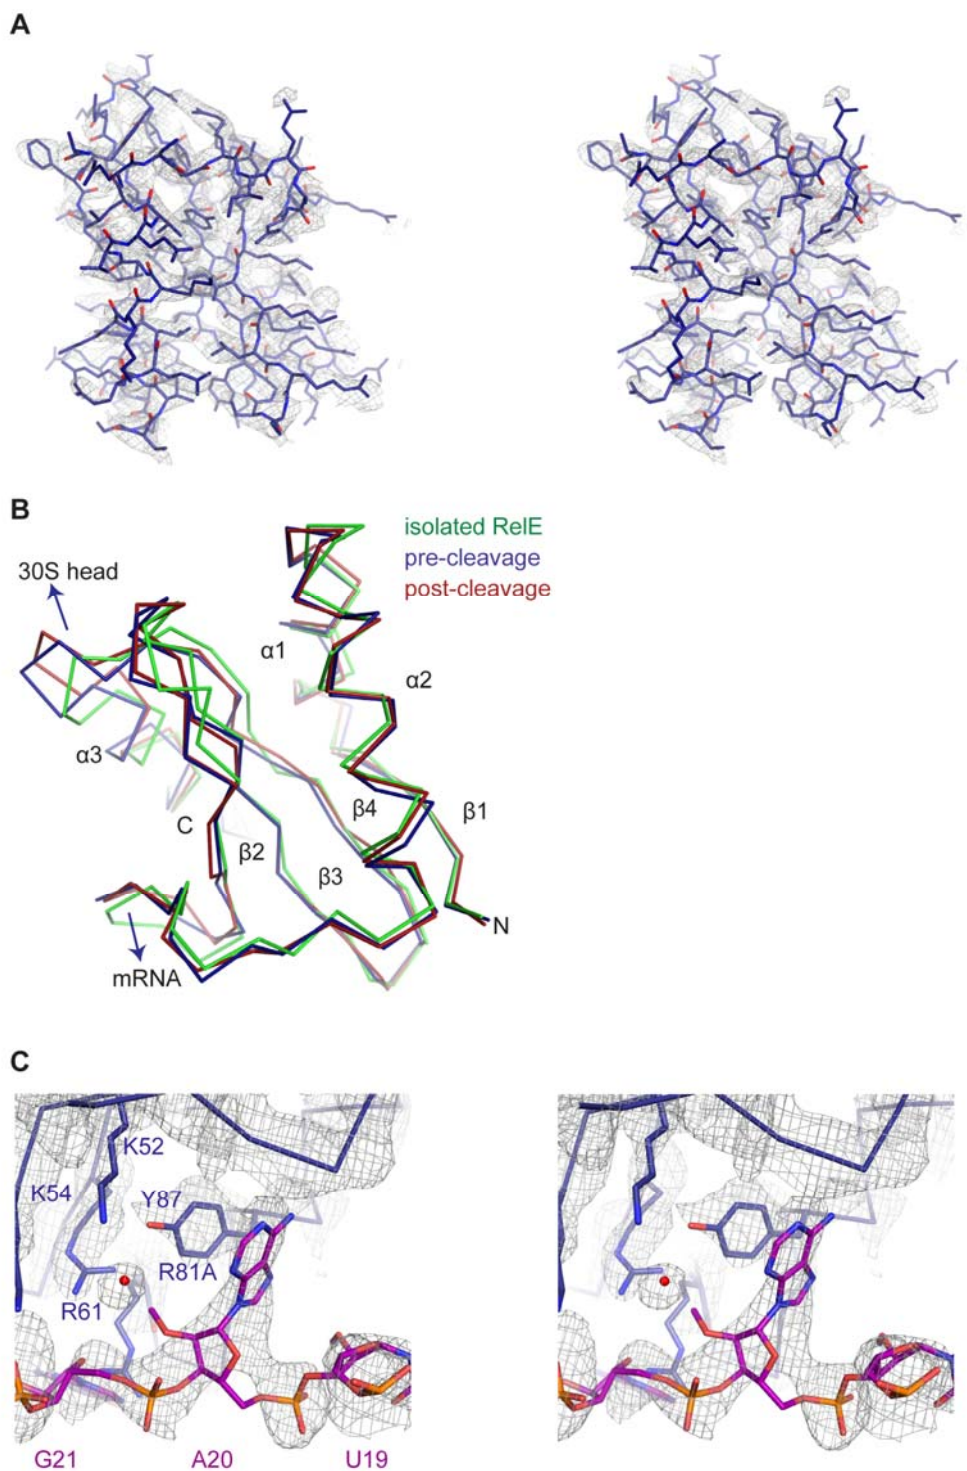

**Figure S1. Electron density and structural comparison.** **A.** Unbiased  $3DF_o-2mF_c$  RelE omit map (contoured at  $1.5\sigma$ ) showing electron density for RelE inside the ribosome in the pre-cleavage structure. **B.** Structural comparison between the crystal structures of isolated RelE (molecule A, green), and the ribosome-bound forms in the pre-cleavage (blue) and post-cleavage (red) states. N and C termini, secondary structure elements, and regions of interaction are shown. **C.** Stereo view of the final, refined  $mF_o-DF_c$  electron density map around the mRNA region in the pre-cleavage state, contoured at  $1.2\sigma$ .

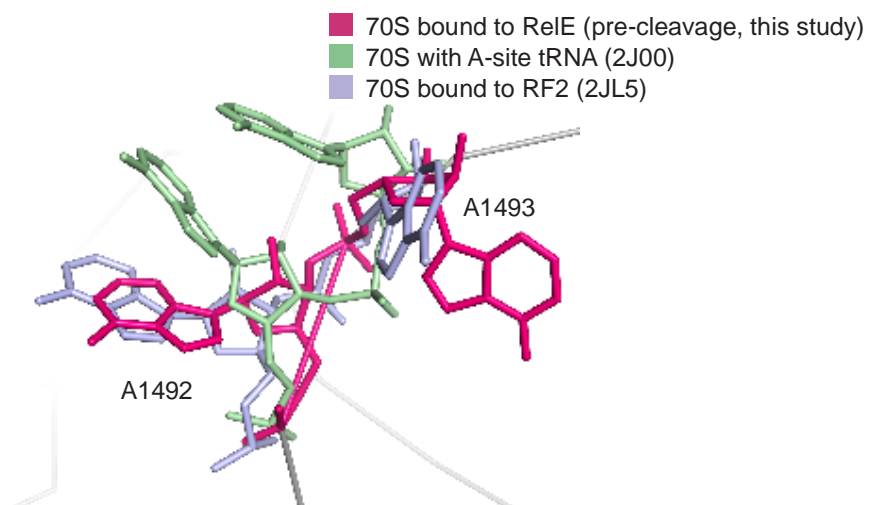

**Figure S2. Conformation of the decoding site.** Conformation of the decoding centre adenosines A1492 and A1493 in a number of ribosome complexes including the 70S bound to RelE (purple, this study), the 70S bound to A-site tRNA (PDB 2J00 (Selmer et al., 2006)), and the 70S bound to release factor 2 (PDB 2JL5 (Weixlbaumer et al., 2008)).

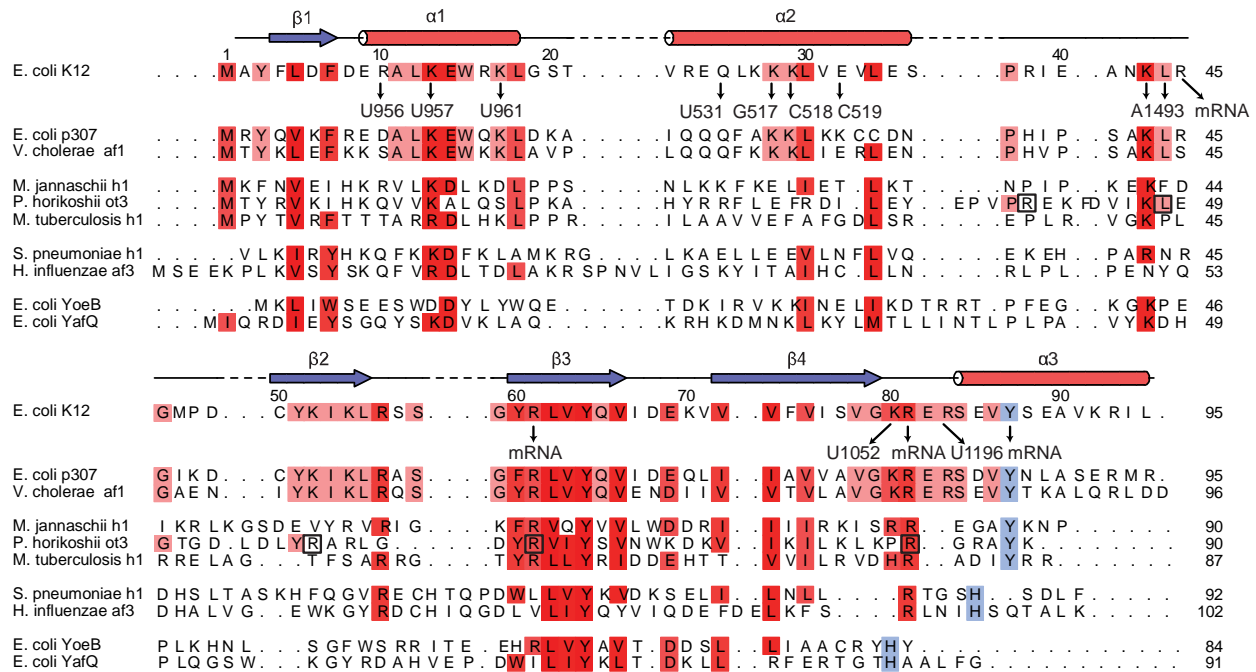

**Figure S3. Sequence alignment of RelE and homologues.** Sequence alignment of the genomic *E. coli* K12 RelE (used for this study) with RelE homologues from a range of archaea and pathogens. *E. coli* p307, a plasmid-borne homologue, *Vibrio cholerae* af1, *Methanococcus jannaschii* h1, *Pyrococcus horikoshii* ot3 with known structure (Takagi et al., 2005), *Mycobacterium tuberculosis* h1, *Streptococcus pneumoniae* h1, *Haemophilus influenzae* af3, and the related toxins, YoeB with known structure (Kamada and Hanaoka, 2005) and YafQ from *E. coli*. The alignment is based on sequence, and for *P. horikoshii* ot3, the available structure (Takagi et al., 2005). Highly conserved residues are shown with increasing strength of red color, and the conserved tyrosine or histidine at the C-terminus with light blue. The secondary structure of *E. coli* RelE is shown above the sequences and contacts to the rRNA or mRNA below the RelE sequence (all rRNA numbers correspond to the *E. coli* 16S). Residues in the *P. horikoshii* RelE homologue that significantly reduces the inhibitory activity when mutated to alanine are indicated with black boxes.

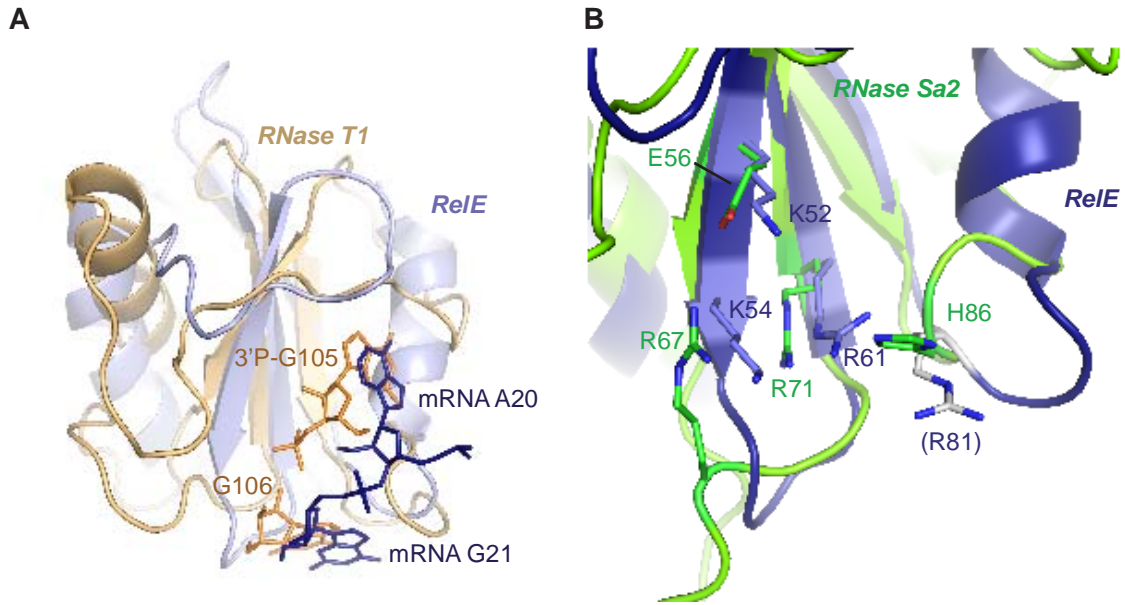

**Figure S4. Comparison of RelE with RNase T1 and RNase Sa2.** **A.** The structure of RNase T1 (light orange, PDB 1RGA (Zegers et al., 1994)) superimposed on the ribosome-bound structure of RelE in the pre-cleavage state (light blue) with the two guanosine residues in the RNase T1 structure and A-site codon positions 2 (A20) and 3 (G21) of the present structure shown as orange and blue sticks, respectively. **B.** Structural superposition of RNase Sa2 (green, PDB 3D5I (Bauerova-Hlinkova et al., 2009)) and RelE in the pre-cleavage state (blue) showing equivalent positions of important residues.
